# Supplementary material for: Effector memory CD8 T-cells as a novel peripheral blood biomarker for activated T-cell pediatric acute liver failure
Source: PubMed Central journal article supplement (PMC10237500; doi:10.1371/journal.pone.0286394), 2023-06-02
Supplement: pone.0286394.s001.pdf [file pone.0286394.s001.pdf]

**S1 Table. Demographic, laboratory, and clinical characteristics for all 10 enrolled patients**

|                                                             | <b>All Patients<br/>n=10</b> | <b>Activated T-cell<br/>hepatitis<br/>n=4</b> | <b>Indeterminate<br/>PALF<br/>n=6</b> | <b>P<br/>value</b> |
|-------------------------------------------------------------|------------------------------|-----------------------------------------------|---------------------------------------|--------------------|
| <b><i>At Study Enrollment</i></b>                           |                              |                                               |                                       |                    |
| Age, years                                                  | 10 (4-14)                    | 4 (3-7)                                       | 13 (9-15)                             | 0.23               |
| Gender, male                                                | 4 (40)                       | 2 (50)                                        | 2 (33)                                | >0.99              |
| Symptoms prior to admission, weeks                          | 1.5 (0.5-2.8)                | 3.0 (2.8-3.0)                                 | 0.5 (0.5-0.9)                         | 0.01               |
| Hepatic encephalopathy level 0-1                            | 6 (60)                       | 3 (75)                                        | 3 (50)                                | 0.57               |
| Alanine aminotransferase (IU/L)                             | 1715 (1396-3710)             | 1576 (1276-1965)                              | 2879 (1477-7772)                      | 0.35               |
| Total bilirubin (mg/dL)                                     | 14.3 (4.1-17.5)              | 18.6 (17.5-19.8)                              | 4.2 (1.9-11.6)                        | 0.01               |
| International normalized ratio                              | 2.1 (2.0-2.2)                | 2.1 (2.0-2.1)                                 | 2.1 (2.0-2.3)                         | 0.92               |
| Total white blood cell count (1000/mm <sup>3</sup> )        | 6.1 (3.5-9.0)                | 3.0 (2.2-4.9)                                 | 8.2 (5.3-9.0)                         | 0.17               |
| Hemoglobin (g/dL)                                           | 10.9 (10.1-12.1)             | 10.6 (10.2-11.6)                              | 11.2 (9.6-12.1)                       | 0.99               |
| Platelet count (1000/mm <sup>3</sup> )                      | 183 (157-247)                | 183 (150-218)                                 | 199 (157-289)                         | 0.65               |
| <b><i>Worst values during admission</i></b>                 |                              |                                               |                                       |                    |
| Hepatic encephalopathy 2-4                                  | 5 (50)                       | 2 (50)                                        | 3 (50)                                | >0.99              |
| Highest alanine aminotransferase (IU/L)                     | 2381 (1643-6366)             | 1876 (1513-2249)                              | 6068 (2619-8416)                      | 0.26               |
| Highest total bilirubin (mg/dL)                             | 17.7 (5.7-21.6)              | 21.6 (20.4-22.6)                              | 6.4 (2.2-13.3)                        | 0.04               |
| Highest international normalized ratio                      | 2.3 (2.1-2.6)                | 2.3 (2.2-2.4)                                 | 2.3 (2.1-3.8)                         | 0.88               |
| Lowest total white blood cell count (1000/mm <sup>3</sup> ) | 2.2 (1.4-7.3)                | 1.7 (1.3-5.5)                                 | 4.0 (1.7-7.3)                         | 0.76               |
| Lowest hemoglobin (g/dL)                                    | 10.1 (8.0-10.9)              | 10.3 (9.4-11.0)                               | 9.7 (7.8-10.8)                        | 0.76               |
| Lowest platelet count (1000/mm <sup>3</sup> )               | 133 (57-223)                 | 140 (100-179)                                 | 105 (57-229)                          | >0.99              |
| <b><i>Outcome and follow up</i></b>                         |                              |                                               |                                       |                    |
| Duration of admission, days                                 | 11.5 (7.3-14.8)              | 9.0 (7.8-11.3)                                | 13.5 (6.3-18.5)                       | 0.76               |
| Admission to normal liver enzymes, days                     | 81.0 (46.5-92.0)             | 110.0 (92.0-130.0)                            | 52.0 (36.5-84.0)                      | 0.11               |
| <b><i>Immune studies</i></b>                                |                              |                                               |                                       |                    |
| Soluble IL-2 receptor (IU/mL)                               | 1916 (1311-5112)             | 4588 (1689-8653)                              | 1664 (995-2132)                       | 0.26               |
| Perforin and Granzyme B Assay, n                            | 8                            | 4                                             | 4                                     |                    |
| % CD8 T-cells Perforin+                                     | 18.5 (8.0-27.0)              | 29.5 (18.5-44.0)                              | 11.5 (7.0-16.5)                       | 0.34               |
| % CD8 T-cells Granzyme+                                     | 36.5 (16.8-57.8)             | 60.5 (44.5-70.0)                              | 25.0 (14.3-34.3)                      | 0.20               |
| Clinical T & B cell quantitation                            |                              |                                               |                                       |                    |
| CD4 to CD8 T-cell ratio                                     | 1.3 (0.5-1.7)                | 0.3 (0.3-0.7)                                 | 1.5 (1.2-1.9)                         | 0.11               |
| % CD8+ T-cells                                              | 31.0 (25.5-33.8)             | 34.5 (26.5-40.3)                              | 30.0 (25.5-33.0)                      | 0.45               |
| % HLA-DR+ T-cells                                           | 12.0 (5.0-27.3)              | 32.0 (23.8-37.3)                              | 8.0 (5.0-12.5)                        | 0.11               |
| Research Flow cytometry                                     |                              |                                               |                                       |                    |
| CD4 to CD8 T-cell ratio                                     | 1.5 (1.2-1.8)                | 0.8 (0.3-1.6)                                 | 1.6 (1.5-1.8)                         | 0.26               |
| % CD8+ T-cells                                              | 36.4 (31.7-42.0)             | 46.3 (34.7-56.2)                              | 34.5 (31.7-37.1)                      | 0.26               |
| % Effector memory CD8+ T-cells                              | 29.5 (16.7-57.4)             | 66.8 (57.4-68.7)                              | 19.1 (14.1-27.5)                      | 0.02               |
| % Effector memory CD8+ CD103+ T-cells                       | 8.8 (5.3-15.3)               | 12.4 (9.5-14.7)                               | 5.8 (4.7-15.0)                        | 0.48               |

<sup>a</sup>Data are medians (interquartile range) or n (%).

**S2 Table. Clinical and research immune studies data for 3 younger activated T-cell hepatitis patients compared to indeterminate PALF patients**

|                                       | <b>Activated T-cell hepatitis ≤ 5y<br/>n=3</b> | <b>Indeterminate PALF<br/>n=4</b> | <b>P value</b> |
|---------------------------------------|------------------------------------------------|-----------------------------------|----------------|
| Soluble IL-2 receptor (IU/mL)         | 7430 (4588-9875)                               | 2116 (1875-3135)                  | 0.4            |
| Perforin and Granzyme B Assay, n      | 3                                              | 2                                 |                |
| % CD8 T-cells Perforin+               | 36.0 (29.5-52.0)                               | 16.5 (12.8-20.3)                  | 0.4            |
| % CD8 T-cells Granzyme+               | 66.0 (60.5-74.0)                               | 25.0 (21.5-28.5)                  | 0.2            |
| Clinical T & B cell quantitation      |                                                |                                   |                |
| CD4 to CD8 T-cell ratio               | 0.3 (0.2-0.3)                                  | 1.8 (1.5-2.6)                     | 0.06           |
| % CD8+ T-cells                        | 40.0 (34.5-40.5)                               | 26.0 (21.3-28.5)                  | 0.11           |
| % HLA-DR+ T-cells                     | 34.0 (32.0-40.5)                               | 8.0 (4.8-11.5)                    | 0.06           |
| Research Flow cytometry               |                                                |                                   |                |
| CD4 to CD8 T-cell ratio               | 0.4 (0.3-0.8)                                  | 1.8 (1.7-3.3)                     | 0.06           |
| % CD8+ T-cells                        | 54.4 (46.3-58.0)                               | 32.4 (26.1-34.1)                  | 0.06           |
| % Effector memory CD8+ T-cells        | 67.2 (66.8-70.2)                               | 19.1 (13.4-25.2)                  | 0.06           |
| % Effector memory CD8+ CD103+ T-cells | 14.4 (12.4-15.0)                               | 4.7 (4.5-5.3)                     | 0.06           |

<sup>a</sup>Data are medians (interquartile range).
